# Supplementary material for: Mimicking 2,2′:6′,2′′:6′′,2′′′-quaterpyridine complexes for the light-driven hydrogen evolution reaction: synthesis, structural, thermal and physicochemical characterizations
Source: Royal Society of Chemistry journal article supplement (doi:10.1039/c9ra04303a), 2019-01-01
Supplement: c9ra04303a1.pdf [file c9ra04303a1.pdf]

## Supplementary Information

### Mimicking 2, 2':6', 2'':6'', 2''':6'''-Quaterpyridine Complexes for the Light-Driven Hydrogen Evolution Reaction: Synthesis, Structural, Thermal and Physicochemical Characterizations

Sanil Rajak,<sup>a</sup> Olivier Schott,<sup>b</sup> Prabhjyot Kaur,<sup>a</sup> Thierry Maris,<sup>b</sup> Garry S. Hanan<sup>b</sup> and Adam Duong<sup>\*a</sup>  
<sup>a</sup>*Département de Chimie, Biochimie et physique and Institut de Recherche sur l'Hydrogène, Université du Québec à Trois-Rivières, Trois-Rivières, Québec, G9A 5H7, Canada*

<sup>b</sup>*Département de Chimie, Université de Montréal, Montréal, Québec, H3C 3J7, Canada*

| Contents                                                                                                                                                                                                                                                                            | Page |
|-------------------------------------------------------------------------------------------------------------------------------------------------------------------------------------------------------------------------------------------------------------------------------------|------|
| I. <b>Fig. S1</b> Thermal atomic displacement ellipsoid plot of the structure of <b>12</b> grown from DMSO/EtOAc                                                                                                                                                                    | S3   |
| II. <b>Fig. S2</b> Thermal atomic displacement ellipsoid plot of the structure of <b>13</b> grown from DMSO/EtOAc                                                                                                                                                                   | S3   |
| III. <b>Fig. S3</b> Thermal atomic displacement ellipsoid plot of the structure of <b>14</b> grown from DMSO/THF                                                                                                                                                                    | S4   |
| IV. <b>Table S1</b> Hydrogen-bond geometry (Å, °) in structure of <b>12</b>                                                                                                                                                                                                         | S4   |
| V. <b>Table S2</b> Hydrogen-bond geometry (Å, °) in structure of <b>13</b>                                                                                                                                                                                                          | S5   |
| VI. <b>Table S3</b> Hydrogen-bond geometry (Å, °) in structure of <b>14</b>                                                                                                                                                                                                         | S5   |
| VII. <b>Fig. S4</b> TGA curves of <b>6</b> and <b>12-14</b>                                                                                                                                                                                                                         | S6   |
| VIII. <b>Fig. S5</b> IR spectra of <b>6</b> and <b>12-14</b>                                                                                                                                                                                                                        | S6   |
| IX. <b>Table S4</b> IR data and assignments of vibrations in ligand <b>6</b> and complexes <b>12-14</b>                                                                                                                                                                             | S7   |
| X. <b>Fig. S6.</b> Cyclic voltammetry of <b>6</b> , <b>12</b> and <b>13</b> in full scale                                                                                                                                                                                           | S8   |
| XI. <b>Table S5</b> Cyclic voltammetry data of 2, 2':6', 2'':6'', 2''':6'''-quaterpyridine complexes reported in literature                                                                                                                                                         | S8   |
| XII. <b>Fig. S7</b> Emission spectrum of blue LED                                                                                                                                                                                                                                   | S9   |
| XIII. <b>Table S6</b> Emission maxima and amplitude of LED light                                                                                                                                                                                                                    | S9   |
| XIV. <b>Fig. S8.</b> Hydrogen evolution reaction of Co(NO <sub>3</sub> ) <sub>2</sub> · 6H <sub>2</sub> O, Ni(NO <sub>3</sub> ) <sub>2</sub> · 6H <sub>2</sub> O and Cu(NO <sub>3</sub> ) <sub>2</sub> · 2.5H <sub>2</sub> O (1 mM each) under blue light. (a) TON's and (b) TOF's. | S9   |
| XV. <b>Fig. S9.</b> Photosensitizer based processes in light-driven hydrogen evolution                                                                                                                                                                                              | S10  |

|       |                                                                                                                           |     |
|-------|---------------------------------------------------------------------------------------------------------------------------|-----|
|       | reaction                                                                                                                  |     |
| XVI.  | <b>Fig. S10.</b> Heterolytic and homolytic mechanisms of hydrogen evolution reaction catalysed by molecular photocatalyst | S11 |
| XVII. | <b>References</b>                                                                                                         | S11 |

---

\*To whom correspondence should be addressed. E-mail: [adam.duong@uqtr.ca](mailto:adam.duong@uqtr.ca)

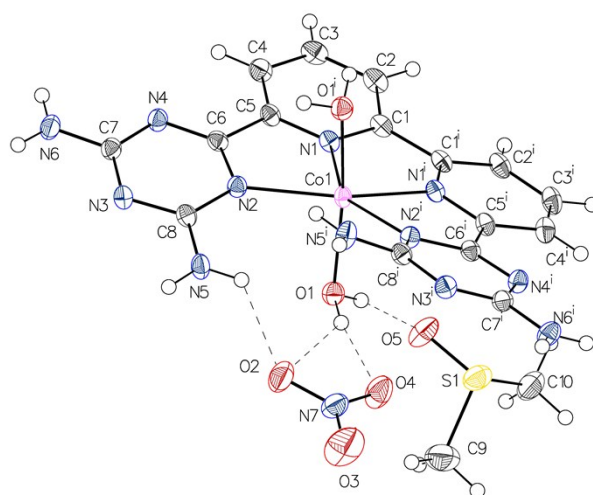

**Fig. S1.** Thermal atomic displacement ellipsoid plot of the structure of **12** grown from DMSO/EtOAc. The ellipsoids of non-hydrogen atoms are drawn at 50% probability level, and hydrogen atoms are represented by a sphere of arbitrary size.

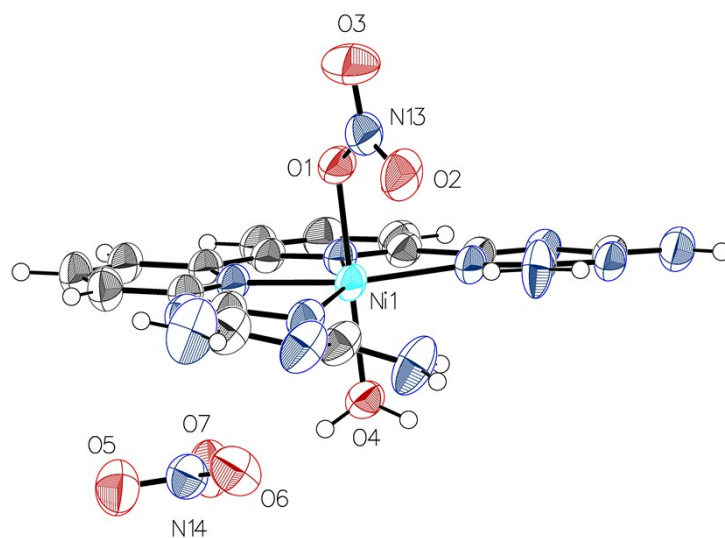

**Fig. S2.** Thermal atomic displacement ellipsoid plot of the structure of **13** grown from DMSO/EtOAc. The ellipsoids of non-hydrogen atoms are drawn at 50% probability level, and hydrogen atoms are represented by a sphere of arbitrary size.

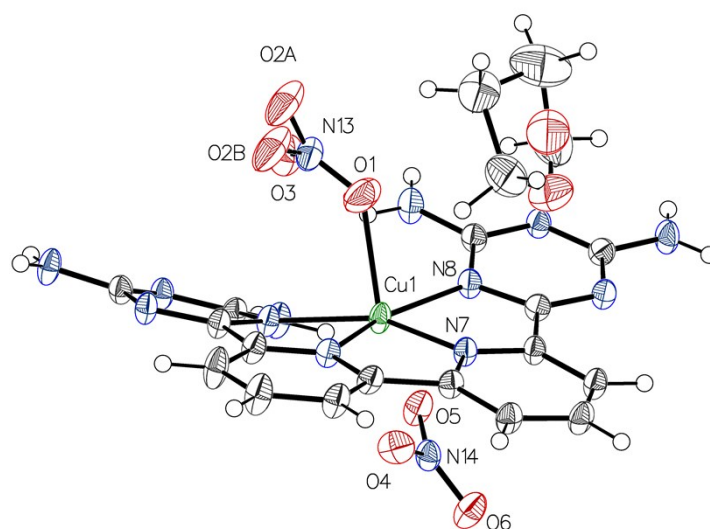

**Fig. S3.** Thermal atomic displacement ellipsoid plot of the structure of **14** grown from DMSO/THF.

The ellipsoids of non-hydrogen atoms are drawn at 50% probability level, and hydrogen atoms are represented by a sphere of arbitrary size

**Table S1.** Hydrogen-bond geometry (Å, °) in structure of **12**

| <i>D</i> —H··· <i>A</i>            | <i>D</i> —H | H··· <i>A</i> | <i>D</i> ··· <i>A</i> | <i>D</i> —H··· <i>A</i> |
|------------------------------------|-------------|---------------|-----------------------|-------------------------|
| O1—H1 <i>A</i> ···O2               | 0.88        | 2.46          | 3.165 (3)             | 138                     |
| O1—H1 <i>A</i> ···O4               | 0.88        | 1.93          | 2.789 (3)             | 164                     |
| O1—H1 <i>A</i> ···N7               | 0.88        | 2.55          | 3.403 (3)             | 167                     |
| O1—H1 <i>B</i> ···S1               | 0.88        | 2.94          | 3.6667 (18)           | 142                     |
| O1—H1 <i>B</i> ···O5               | 0.88        | 1.86          | 2.727 (3)             | 167                     |
| N5—H5 <i>A</i> ···N3 <sup>i</sup>  | 0.88        | 2.24          | 3.059 (3)             | 156                     |
| N5—H5 <i>B</i> ···O2               | 0.88        | 2.16          | 2.811 (3)             | 131                     |
| N6—H6 <i>A</i> ···O2 <sup>i</sup>  | 0.88        | 2.09          | 2.962 (3)             | 173                     |
| N6—H6 <i>B</i> ···O5 <sup>ii</sup> | 0.88        | 2.03          | 2.878 (3)             | 162                     |

Symmetry codes: (i)  $-x+1, -y+2, -z+1$ ; (ii)  $-x+1, -y+1, -z+1$ .

**Table S2.** Hydrogen-bond geometry (Å, °) in structure of **13**

| <i>D</i> —H··· <i>A</i>             | <i>D</i> —H | H··· <i>A</i> | <i>D</i> ··· <i>A</i> | <i>D</i> —H··· <i>A</i> |
|-------------------------------------|-------------|---------------|-----------------------|-------------------------|
| N11—H11 <i>A</i> ···O5              | 0.83 (4)    | 2.17 (4)      | 2.998 (3)             | 172 (3)                 |
| N11—H11 <i>B</i> ···O5 <sup>i</sup> | 0.88 (5)    | 2.59 (4)      | 3.180 (3)             | 125 (3)                 |
| N11—H11 <i>B</i> ···O6 <sup>i</sup> | 0.88 (5)    | 2.19 (5)      | 3.051 (3)             | 165 (4)                 |
| N5—H5 <i>A</i> ···O2                | 0.85 (4)    | 2.24 (4)      | 2.957 (3)             | 142 (3)                 |
| N5—H5 <i>A</i> ···N11               | 0.85 (4)    | 2.54 (4)      | 3.153 (3)             | 129 (3)                 |
| N5—H5 <i>B</i> ···O9                | 0.79 (4)    | 2.19 (4)      | 2.954 (4)             | 161 (4)                 |
| N6—H6 <i>A</i> ···O10               | 0.87 (4)    | 2.06 (4)      | 2.926 (3)             | 173 (3)                 |
| N6—H6 <i>B</i> ···O4 <sup>ii</sup>  | 0.81 (4)    | 2.25 (4)      | 3.040 (3)             | 165 (4)                 |
| N12—H12 <i>A</i> ···O8              | 0.80 (4)    | 2.11 (4)      | 2.903 (4)             | 170 (4)                 |
| N12—H12 <i>B</i> ···O7              | 0.79 (4)    | 2.23 (4)      | 2.994 (4)             | 162 (4)                 |

Symmetry codes: (i)  $-x+1, -y+1, -z+1$ ; (ii)  $-x, -y+1, -z+1$ .

**Table S3.** Hydrogen-bond geometry (Å, °) in structure of **14**

| <i>D</i> —H··· <i>A</i>                        | <i>D</i> —H | H··· <i>A</i> | <i>D</i> ··· <i>A</i> | <i>D</i> —H··· <i>A</i> |
|------------------------------------------------|-------------|---------------|-----------------------|-------------------------|
| N5—H5 <i>A</i> ···O20 <i>A</i> <sup>i</sup>    | 0.88        | 2.01          | 2.822 (7)             | 153                     |
| N5—H5 <i>A</i> ···O20 <i>B</i> <sup>i</sup>    | 0.88        | 1.97          | 2.826 (16)            | 163                     |
| N5—H5 <i>B</i> ···O5                           | 0.88        | 2.14          | 2.941 (4)             | 151                     |
| N6—H6 <i>A</i> ···O6 <sup>ii</sup>             | 0.88        | 2.10          | 2.966 (4)             | 169                     |
| N6—H6 <i>B</i> ···N9 <sup>iii</sup>            | 0.88        | 2.17          | 3.023 (4)             | 163                     |
| N11—H11 <i>A</i> ···N4 <sup>i</sup>            | 0.88        | 2.25          | 3.129 (4)             | 176                     |
| N11—H11 <i>B</i> ···O3                         | 0.88        | 2.25          | 2.972 (5)             | 140                     |
| N11—H11 <i>B</i> ···N5                         | 0.88        | 2.56          | 3.130 (5)             | 124                     |
| N12—H12 <i>A</i> ···O4 <sup>iv</sup>           | 0.88        | 2.12          | 2.936 (4)             | 154                     |
| N12—H12 <i>B</i> ···O21 <i>A</i> <sup>iv</sup> | 0.88        | 1.96          | 2.800 (6)             | 158                     |

Symmetry codes: (i)  $-x+1/2, y-1/2, -z+3/2$ ; (ii)  $x-1, y, z$ ; (iii)  $-x+1/2, y+1/2, -z+3/2$ ; (iv)  $-x+3/2, y-1/2, -z+3/2$ .

## Thermal analysis

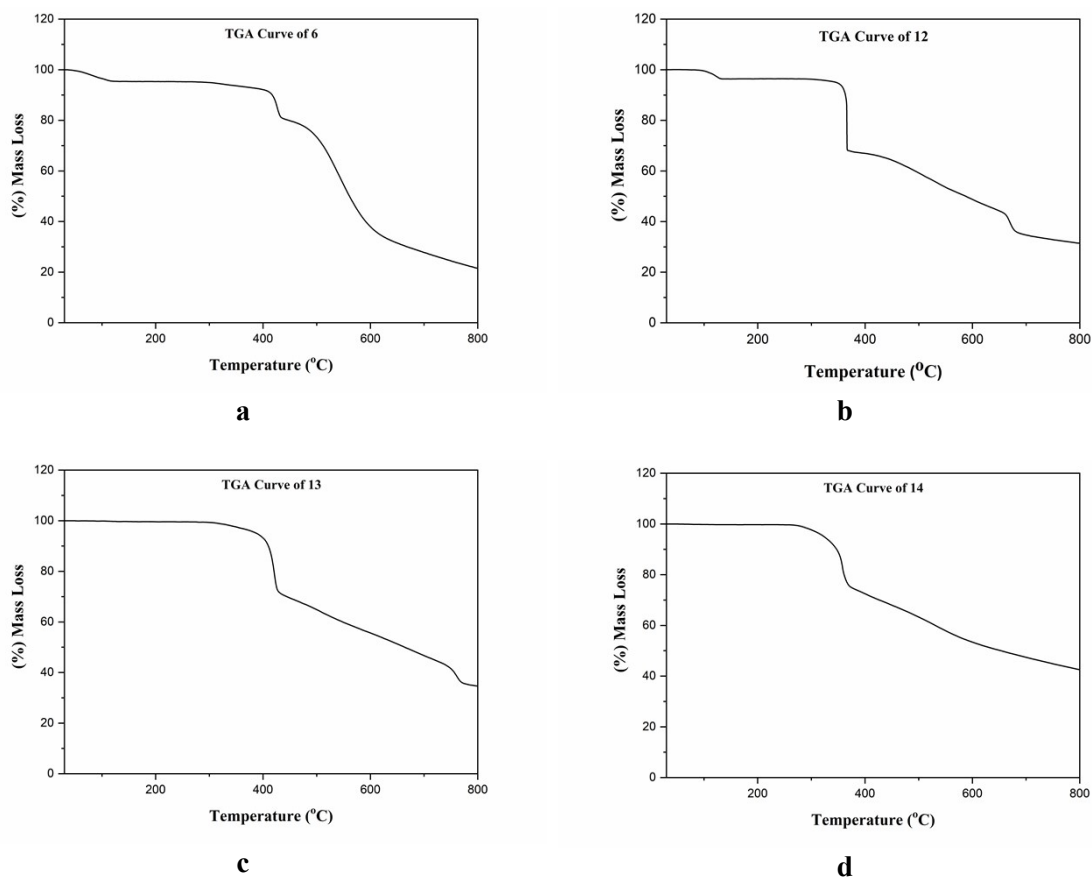

**Fig. S4.** Thermogravimetric analysis (TGA) curves of **6** and **12-14**

## Infrared spectroscopy

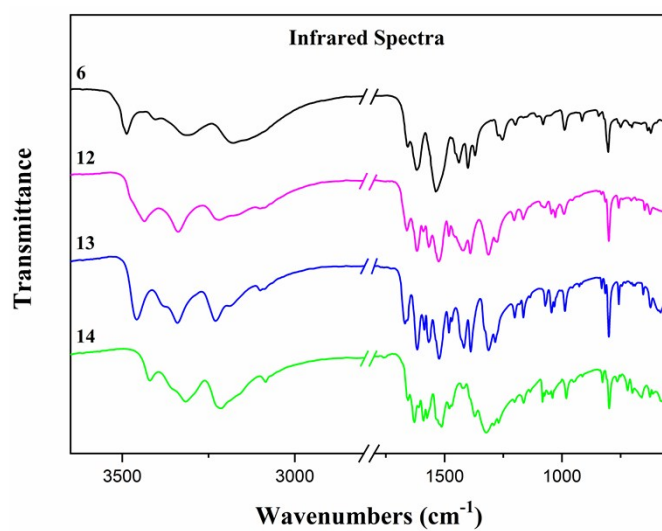

**Fig. S5.** Infrared spectra of **6** and **12-14**

**Table S4.** IR data and assignments of vibrations for ligand **6** and complexes **12-14**

| $\tilde{\nu}/\text{cm}^{-1}$ |        |       |        | Assignment***                                                                                  |
|------------------------------|--------|-------|--------|------------------------------------------------------------------------------------------------|
| 6                            | 12     | 13    | 14     |                                                                                                |
| 594w                         | 572w   | 579w  | 611w   | $\tau(\text{NO}_3^-)$                                                                          |
| 621w                         | 625w   | 623w  | 625w   | Triazine as well as bipyridine ring out-of-plane def. $\gamma(\text{C-N}), \gamma(\text{C-C})$ |
| 635w                         | 648w   | 654w  | 660w   |                                                                                                |
| 702w                         | 705vw  | 705vw | 700w   | Triazine ring out-of-plane def. $\gamma(\text{C-N}), \omega(\text{NH}_2)$                      |
| 711sh                        |        | 729vw | 720w   |                                                                                                |
| 750w                         | 742vw  | 745vw | 749w   | $\omega(\text{NH}_2)$                                                                          |
| 761sh                        | 758w   | 758w  | 765w   |                                                                                                |
| 803m                         | 800m   | 800s  | 799m   |                                                                                                |
| 820sh                        | 817w   | 816w  | 827w   | Triazine ring out-of-plane def. $\gamma(\text{C-N}), \omega(\text{C-H})$                       |
| 843w                         | 832w   | 831w  |        |                                                                                                |
| 914w                         |        | 917w  | 912w   |                                                                                                |
|                              |        | 927w  |        | Ring breathing both triazine as well as bipyridine                                             |
|                              | 955vw  | 955vw | 951w   |                                                                                                |
| 989w                         | 991w   | 987w  | 981w   |                                                                                                |
|                              | 1029w  | 1032w |        |                                                                                                |
|                              | 1045w  | 1044w | 1040w  |                                                                                                |
|                              |        |       | 1058w  | $\tau(\text{NH}_2)$                                                                            |
|                              | 1077w  | 1071w | 1074w  |                                                                                                |
| 1080w                        |        |       | 1083w  |                                                                                                |
| 1108sh                       |        | 1136w | 1134w  | Bipyridine ring breathing, $\rho(\text{NH}_2), \rho(\text{C-H})$                               |
| 1157sh                       | 1165w  | 1164w | 1163w  | $\omega(\text{NH}_2), \delta(\text{C-H}), \rho(\text{NH}_2)$                                   |
| 1198w                        | 1203w  | 1201w | 1201w  | Triazine ring def., $\tau(\text{NH}_2)$                                                        |
| 1254w                        | 1276m  | 1284m | 1270w  |                                                                                                |
| 1275w                        |        |       | 1288w  | $\nu(\text{C-N})$ aromatic amines                                                              |
|                              | 1313s  | 1313s | 1323s  | $\nu(\text{NO}_3^-)$                                                                           |
| 1370w                        | 1390s  | 1388s | 1371m  | $\rho(\text{C-H})$                                                                             |
| 1401m                        |        |       |        |                                                                                                |
| 1439m                        | 1423s  | 1418s | 1417w  |                                                                                                |
| 1456w                        | 1454sh | 1470w | 1470w  | $\rho(\text{C-H})$                                                                             |
|                              | 1482w  | 1481w | 1480w  |                                                                                                |
| 1537s                        | 1525s  | 1523s | 1513s  | Bipyridine ring breathing $\nu(\text{C-C}), \delta(\text{NH}_2)$                               |
|                              |        |       | 1522sh |                                                                                                |
|                              | 1567m  | 1568m | 1574m  | $\delta(\text{NH}_2)$                                                                          |
|                              | 1591w  | 1588w | 1590m  |                                                                                                |
| 1618s                        | 1617s  | 1616s | 1609w  | Triazine ring breathing $\nu(\text{C-N}), \delta(\text{NH}_2)$                                 |
|                              |        |       | 1629m  |                                                                                                |
| 1657w                        | 1661m  | 1658w | 1655w  | Triazine ring breathing $\nu(\text{C-N})$                                                      |
|                              |        | 1668m |        |                                                                                                |
|                              |        |       | 3066sh |                                                                                                |
|                              | 3084w  | 3083w | 3085w  | $\nu(\text{C-H})$                                                                              |
| 3137s                        | 3099w  | 3100w |        |                                                                                                |
| 3178s                        | 3165sh | 3185w | 3154sh | $\nu_s(\text{NH}_2)$                                                                           |
| 3312s                        | 3219m  | 3230s | 3214s  | $\nu_{as}(\text{NH}_2)$                                                                        |
| 3405w                        | 3338s  | 3340s | 3316s  | $\nu_s(\text{NH}_2), \nu_{as}(\text{NH}_2)$                                                    |
|                              |        | 3381w | 3360sh |                                                                                                |
| 3487m                        | 3436m  | 3458s | 3420m  | $\nu_{as}(\text{NH}_2)$                                                                        |

\*\*\*Abbreviation used for the type of vibration mode. def.: deformation;  $\delta, \gamma, \rho, \tau, \omega$ : bending vibrations;  $\nu$ : stretching vibration

## Cyclic Voltammetry

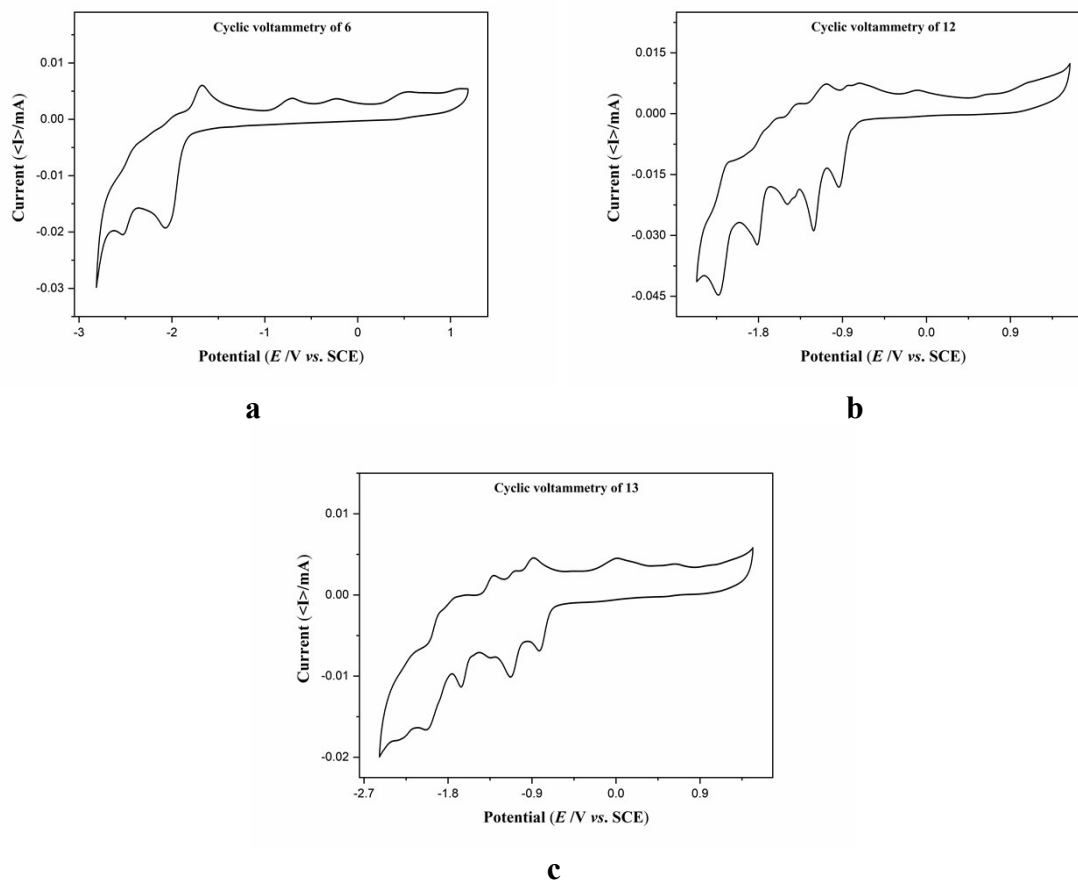

**Fig. S6.** Cyclic voltammetry of **6**, **12** and **13** in full scale

**Table S5.** Cyclic voltammetry data of 2, 2':6', 2'':6'', 2''':6'''-quaterpyridine complexes reported in literature

| Compound                                                                              | Solvent | Eox <sub>1/2</sub> [V] | Ered <sub>1/2</sub> [V] | Ered <sub>2/2</sub> [V] | Ered <sub>3/2</sub> [V] | Ered <sub>4/2</sub> [V] |
|---------------------------------------------------------------------------------------|---------|------------------------|-------------------------|-------------------------|-------------------------|-------------------------|
| Co(qtpy)(H <sub>2</sub> O) <sub>2</sub> (ClO <sub>4</sub> ) <sub>2</sub> <sup>1</sup> | MeCN    |                        | -0.65                   | -1.15                   | ---                     | ---                     |
| Ni(qtpy)(ClO <sub>4</sub> ) <sub>2</sub> <sup>1</sup>                                 | DMF     |                        | -0.79                   | -1.13                   | -1.90                   | ---                     |
| Cu(qtpy)(PF <sub>6</sub> ) <sub>2</sub> <sup>2</sup>                                  | MeCN    | 0.13 (nr)              | -0.24 (nr)              | ---                     | ---                     | ---                     |

qtpy = 2, 2':6', 2'':6'', 2''':6'''-quaterpyridine, nr = non-reversible



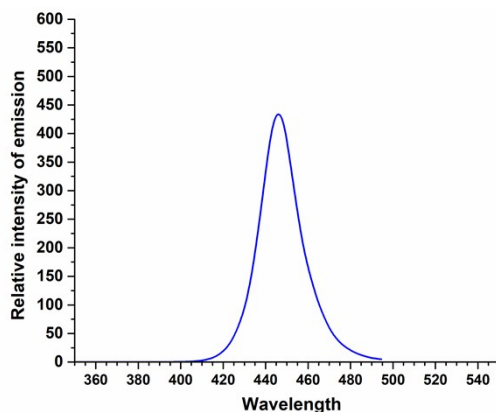

**Fig. S7** Emission spectrum of blue LED.

**Table S6.** Emission maxima and amplitude of LED light.

| Light source <sup>a</sup>                                                                           | Blue |
|-----------------------------------------------------------------------------------------------------|------|
| $\lambda_{\text{max,em}}$ (nm)                                                                      | 445  |
| $\Delta\lambda$ (nm)                                                                                | 90   |
| Photon flux in $\mu\text{mol}_{\text{photons}}\cdot\text{min}^{-1}\cdot\text{cm}^{-2}$ <sup>b</sup> | 20   |

<sup>a</sup> blue LED 445 nm.

<sup>b</sup> an analog power-meter PM100A (THORLABS) associated with a compact photodiode power head with silicon detector S120C is used to evaluate the photon flux for the LEDs. Photo-diode detector is placed at the same distance from the LED surface than the bottom of illuminated vial.

### HER Curves of Co(II), Ni(II) and Cu(II) nitrates

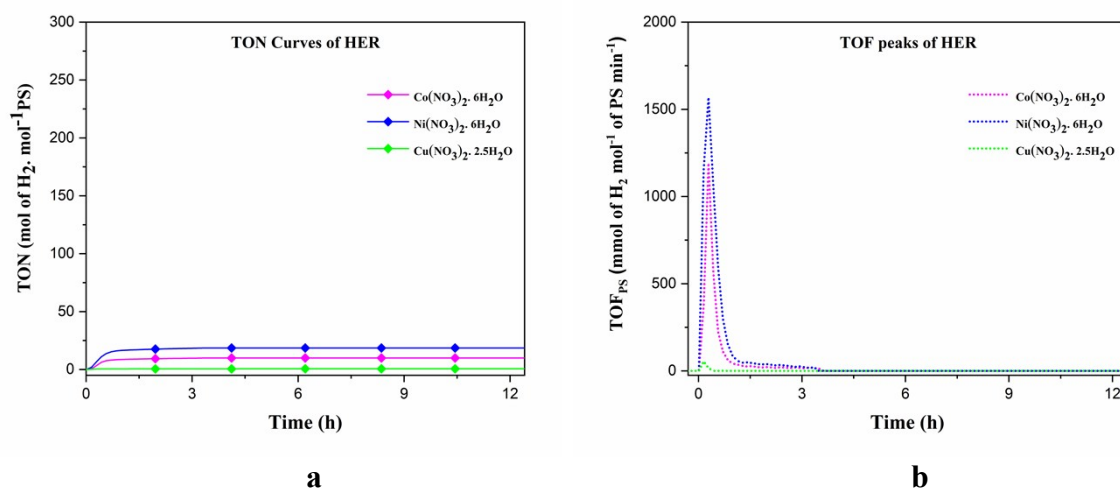

**Fig. S8.** Hydrogen evolution reaction of Co(NO<sub>3</sub>)<sub>2</sub> · 6H<sub>2</sub>O, Ni(NO<sub>3</sub>)<sub>2</sub> · 6H<sub>2</sub>O and Cu(NO<sub>3</sub>)<sub>2</sub> · 2.5H<sub>2</sub>O (1 mM each) under blue light. (a) TON's and (b) TOF's.

## Mechanism of hydrogen evolution reactions

The mechanism of the hydrogen evolution reaction may occur by two important steps; (I) Activation of the molecular catalyst by the photosensitizer and (II) Redox photocatalytic hydrogen evolution.

### Step I

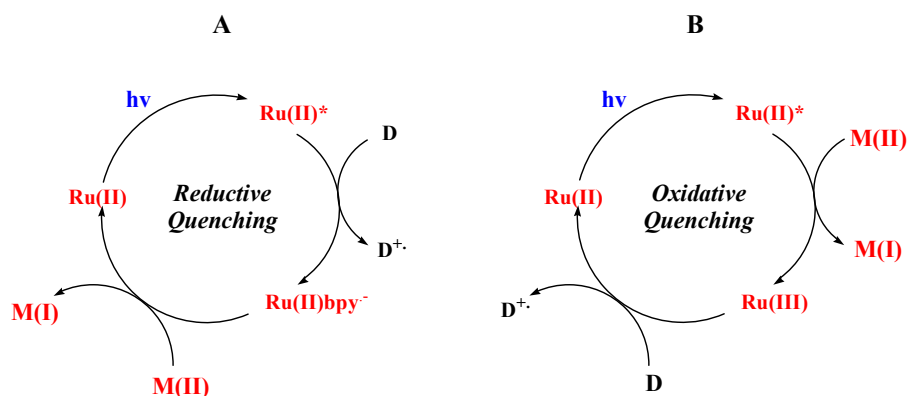

**Fig. S9.** Photosensitizer based processes in light-driven hydrogen evolution reaction

In step I, activation of the molecular photocatalyst can take place either by reductive or oxidative quenching pathways from the excited photosensitizer (PS\*). Visible light is used for the excitation of the photosensitizer where, in the process of reductive quenching (A), the excited PS\* accept an electron from the sacrificial electron donor (SED) and shares it with the molecular catalyst, during this course, the oxidation state of Ru(II) does not change. In the process of oxidative quenching (B), the excited PS\* oxidizes and donates its electron to the molecular catalysts and then abstracts an electron from the SED, this process involves redox changes in Ru(II) PS.

In step II, at the photocatalytic centre, the hydrogen evolution can occur by two different mechanisms.

## Step II

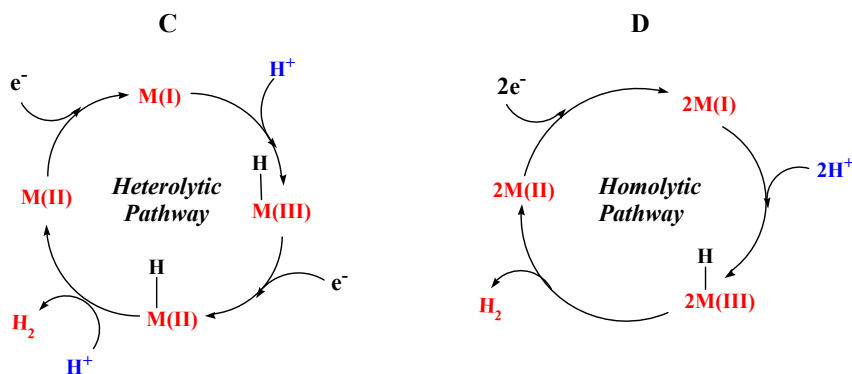

**Fig. S10.** Heterolytic and homolytic mechanisms of hydrogen evolution reaction catalysed by molecular photocatalyst

In heterolytic mechanism (C),  $H_2$  is evolved by the protonation of the intermediate metal hydride. In the catalytic cycle, the two electrons are transferred either consecutively or alternatively. The  $H_2$  evolution in the alternative homolytic pathway (D) happens by the reductive elimination of two metal hydride intermediates. In both the mechanisms, the metal salts of +II oxidation state undergoes one electron reduction before protonation takes place.<sup>3</sup>

## References

1. K-M. Lam, K-Y. Wong, S-M. Yang and C-M. Che, *J. Chem. Soc. Dalton Trans.*, 1995, 7, 1103-1107.
2. E. C. Constable, S. M. Elder, M. J. Hannon, A. Martin, P. R. Raithby and D. A. Tocher, *J. Chem. Soc. Dalton Trans.*, 1996, **12**, 2423-2433.
3. Artero, V.; Chavarot-Kerlidou, M.; Fontecave, M., *Angew. Chem.* 2011, 50 (**32**), 7238-7266.
